# Supplementary material for: The Genetic Relatedness and Antimicrobial Resistance Patterns of Mastitis-Causing Staphylococcus aureus Strains Isolated from New Zealand Dairy Cattle
Source: MDPI journal article supplement (doi:10.3390/vetsci8110287), 2021-11-22

# The Genetic Relatedness and Antimicrobial Resistance Patterns of Mastitis-Causing *Staphylococcus aureus* Strains Isolated from New Zealand Dairy Cattle

Sabrina S. Greening<sup>1\*</sup>, Ji Zhang<sup>2,3</sup>, Anne C. Midwinter<sup>2</sup>, David A. Wilkinson<sup>2,3</sup>, Scott McDougall<sup>1,4</sup>, M. Carolyn Gates<sup>1</sup>, Nigel P. French<sup>2,3</sup>

<sup>1</sup> School of Veterinary Science, Massey University, Palmerston North, New Zealand 4410

<sup>2</sup> Infectious Disease Research Centre, Massey University, Palmerston North, New Zealand 4410

<sup>3</sup> New Zealand Food Safety Science and Research Centre, Hopkirk Research Institute, Massey University, Palmerston North, New Zealand 4410

<sup>4</sup> Cognosco, AnexaFVC, PO Box 21, Morrinsville, New Zealand 3330

\* Correspondence: S.Greening@massey.ac.nz

---

## List of tables

**Supplementary Table S1.** Prevalence of 14 resistance genes identified across 57 *S. aureus*

isolated from bovine raw milk in New Zealand. Genes are listed in ascending order ..... 3  
isolates

**Supplementary Table S2.** Prevalence of 76 virulence genes identified across 57 *S. aureus* isolates

isolated from bovine raw milk in New Zealand. Genes are listed in ascending order with a total of 55  
genes being present in 100% of isolates ..... 4

**Supplementary Table S3.** The antimicrobial sensitivity of 51 *S. aureus* isolates derived from bovine  
milk samples in New Zealand. Sensitivity was determined using a zone diffusion test following the  
procedures provided by the Clinical and Laboratory Standards Institute. The antimicrobials assessed  
included penicillin (PEN, 10 µg), novobiocin (NOV, 5 µg), cefoxitin (CEF, 30 µg), tetracycline (TET,  
30 µg), ceftiofur (XNL, 30 µg), and oxacillin (OXA, 1 µg); with isolates being declared “sensitive”,  
“intermediate” or “resistant”, based on CLSI recommendations. NT indicates that the sensitivity to  
that antimicrobial was not tested. Isolate IDs identify the date the sample was collected

(dd/mm/yyyy), the farm from which it was collected from (A-Q), and the animal ID number (#####).  
..... 5

**Supplementary Table S4.** The presence-absence of 14 resistance genes and the antimicrobial

susceptibility across 51 *S. aureus* isolates. Antimicrobial tested zone diffusion includes penicillin  
(Pen), novobiocin (Nov), cefoxitin (Cef), tetracycline (Tet), ceftiofur (XNL), and oxacillin (OXA);  
with isolates being declared susceptible (S) or resistant (R) (including those also identified as

intermediate), based on CLSI recommendations. Note: one isolate was only tested for *Cef* and *Tet* resistance therefore (–) has been used to indicate cases when no isolates tested had the gene present..7

**Supplementary Table S5.** The dry cow therapy treatment reported by 17 farms from which 50 *S. aureus* isolates were sampled and classified as “sensitive”, “intermediate”, or “resistant” to penicillin (PEN, 10 µg) following a zone diffusion test. For the purpose of this analysis, intermediate” isolates have been groups with the “resistant” isolates. ....8

**Supplementary Table S6.** Scoary result summary showing the genes found to be significantly associated with *S. aureus* isolates showing resistance to either penicillin (n=18) or oxacillin (n=3) and the Gene Ontology (GO) terms indicating either the biological processes or molecular functions associated with the gene products. In total 50 *S. aureus* isolates were included in the analysis with significant genes identified as those with an odds ratio greater than 1, a specificity greater than 95% and, a Benjamini-Hochberg corrected p-value below 0.05..... 9

## List of Figures

**Supplementary Figure S1.** Scatter plot showing the relationship between antimicrobial usage, across 14 dairy herds in the Waikato region of New Zealand’s North Island, and the number of resistant genes found to be present in isolates collected from each farm. The size of each point is proportional to the total number of genes present which the colour indicates which genes were present. AMU: antimicrobial usage, DD: daily dose.....11

**Supplementary Table S1.** Prevalence of 14 resistance genes identified across 57 *S. aureus* isolates isolated from bovine raw milk in New Zealand. Genes are listed in ascending order

| <b>Resistance Gene(s)</b>                 | <b>Number of Isolate (%)</b> |
|-------------------------------------------|------------------------------|
| <i>ant(9)-Ia, dfrC, fusC, mecA, mecR1</i> | 1 (1.75)                     |
| <i>erm(A), qacB</i>                       | 2 (3.51)                     |
| <i>blaPC1, qacA</i>                       | 4 (7.02)                     |
| <i>fosD</i>                               | 6 (10.53)                    |
| <i>blaZ</i>                               | 18 (31.58)                   |
| <i>blaI, blaR1</i>                        | 19 (33.33)                   |
| <i>tet(38)</i>                            | 57 (100.0)                   |

**Supplementary Table S2.** Prevalence of 76 virulence genes identified across 57 *S. aureus* isolates isolated from bovine raw milk in New Zealand. Genes are listed in ascending order with a total of 55 genes being present in 100% of isolates

| <b>Virulence Gene(s)</b>                                                                                                                                                                            | <b>Number of Isolates (%)</b> |
|-----------------------------------------------------------------------------------------------------------------------------------------------------------------------------------------------------|-------------------------------|
| <i>chp, sea, selk</i>                                                                                                                                                                               | 1 (1.75)                      |
| <i>sak, scn</i>                                                                                                                                                                                     | 2 (3.51)                      |
| <i>tsst-1</i>                                                                                                                                                                                       | 3 (5.26)                      |
| <i>sec, sell</i>                                                                                                                                                                                    | 4 (7.02)                      |
| <i>She</i>                                                                                                                                                                                          | 35 (61.40)                    |
| <i>Can</i>                                                                                                                                                                                          | 41 (71.93)                    |
| <i>SdrD</i>                                                                                                                                                                                         | 42 (73.68)                    |
| <i>FnbB</i>                                                                                                                                                                                         | 45 (78.95)                    |
| <i>cap8(H-K)</i>                                                                                                                                                                                    | 49 (85.96)                    |
| <i>esaC, esxB</i>                                                                                                                                                                                   | 50 (87.72)                    |
| <i>SdrE</i>                                                                                                                                                                                         | 51 (89.47)                    |
| <i>lukF-PV, map</i>                                                                                                                                                                                 | 56 (98.25)                    |
| <i>adsA, aur, cap8(A-G), cap8(L-P), clf(A,B,P) coa, ebp, esa(A-B), (essA-C) esxA, fnbA, geh, hlb, hld, hlg(A-C), hly/hla, hysA, ica(A-D,R), isd(A-G), lip, sbi, sdrC, spa, srtB, ssp(A-C), vWbp</i> | 57 (100.0)                    |

**Supplementary Table S3.** The antimicrobial sensitivity of 51 *S. aureus* isolates derived from bovine milk samples in New Zealand. Sensitivity was determined using a zone diffusion test following the procedures provided by the Clinical and Laboratory Standards Institute. The antimicrobials assessed included penicillin (PEN, 10 µg), novobiocin (NOV, 5 µg), cefoxitin (CEF, 30 µg), tetracycline (TET, 30 µg), ceftiofur (XNL, 30 µg), and oxacillin (OXA, 1 µg); with isolates being declared “sensitive”, “intermediate” or “resistant”, based on CLSI recommendations. NT indicates that the sensitivity to that antimicrobial was not tested. Isolate IDs identify the date the sample was collected (dd/mm/yyyy), the farm from which it was collected from (A-Q), and the animal ID number (####).

| Isolate ID       | Sample type | Diameter (mm) (Sensitivity) |        |        |        |        |        |
|------------------|-------------|-----------------------------|--------|--------|--------|--------|--------|
|                  |             | PEN                         | NOV    | CEF    | TET    | XNL    | OXA    |
| 19Jan2016-A-90   | Subclinical | 18 (R)                      | 36 (S) | 30 (S) | 31 (S) | 32 (S) | 21 (S) |
| 27Jan2016-B-849  | Subclinical | 44 (S)                      | 32 (S) | 28 (S) | 30 (S) | 30 (S) | 22 (S) |
| 27Jan2016-B-1019 | Subclinical | 45 (S)                      | 32 (S) | 28 (S) | 29 (S) | 33 (S) | 28 (S) |
| 20Jan2016-C-554  | Subclinical | 46 (S)                      | 40 (S) | 28 (S) | 32 (S) | 34 (S) | 26 (S) |
| 07Jan2016-B-1061 | Clinical    | 46 (S)                      | 35 (S) | 28 (S) | 26 (S) | 32 (S) | 26 (S) |
| 06Jan2016-D-321  | Clinical    | 40 (S)                      | 40 (S) | 30 (S) | 32 (S) | 30 (S) | 24 (S) |
| 05Jan2016-E-452  | Subclinical | 44 (S)                      | 36 (S) | 29 (S) | 30 (S) | 32 (S) | 26 (S) |
| 27Jan2016-B-1323 | Subclinical | 40 (S)                      | 32 (S) | 28 (S) | 32 (S) | 32 (S) | 22 (S) |
| 20Jan2016-C-86   | Subclinical | 40 (S)                      | 34 (S) | 28 (S) | 26 (S) | 30 (S) | 24 (S) |
| 05Jan2016-E-452  | Subclinical | 44 (S)                      | 36 (S) | 28 (S) | 30 (S) | 32 (S) | 25 (S) |
| 08Jan2016-F-20   | Clinical    | 40 (S)                      | 36 (S) | 26 (S) | 29 (S) | 36 (S) | 24 (S) |
| 21Jan2016-F-49   | Clinical    | 42 (S)                      | 38 (S) | 28 (S) | 31 (S) | 31 (S) | 24 (S) |
| 05Jan2016-E-452  | Subclinical | 50 (S)                      | 38 (S) | 29 (S) | 26 (S) | 32 (S) | 28 (S) |
| 30Nov2015-H-163  | Clinical    | 26 (R)                      | 35 (S) | 28 (S) | 34 (S) | 35 (S) | 23 (S) |
| 06Dec2015-I-50   | Clinical    | 38 (S)                      | 35 (S) | 28 (S) | 28 (S) | 35 (S) | 26 (S) |
| 09Dec2015-G-165  | Subclinical | NT                          | NT     | 10 (R) | (S)    | NT     | NT     |
| 05Jan2016-E-80   | Subclinical | 40 (S)                      | 34 (S) | 27 (S) | 26 (S) | 30 (S) | 26 (S) |
| 13Jan2016-J-35   | Subclinical | 38 (S)                      | 36 (S) | 27 (S) | 30 (S) | 32 (S) | 24 (S) |
| 05Jan2016-E-80   | Subclinical | 44 (S)                      | 36 (S) | 26 (S) | 27 (S) | 30 (S) | 26 (S) |
| 13Jan2016-J-76   | Subclinical | 38 (S)                      | 35 (S) | 28 (S) | 31 (S) | 31 (S) | 24 (S) |
| 05Jan2016-E-80   | Subclinical | 42 (S)                      | 36 (S) | 26 (S) | 28 (S) | 31 (S) | 26 (S) |
| 13Jan2016-J-126  | Subclinical | 40 (S)                      | 36 (S) | 28 (S) | 29 (S) | 32 (S) | 24 (S) |
| 19Nov2015-E-222  | Clinical    | 21 (R)                      | 36 (S) | 29 (S) | 31 (S) | 36 (S) | 24 (S) |
| 14Jan2016-K-695  | Subclinical | 11 (R)                      | 34 (S) | 28 (S) | 29 (S) | 27 (S) | 16 (S) |
| 13Jan2016-J-397  | Subclinical | 40 (S)                      | 35 (S) | 26 (S) | 29 (S) | 30 (S) | 24 (S) |
| 14Jan2016-K-501  | Subclinical | 40 (S)                      | 35 (S) | 30 (S) | 29 (S) | 29 (S) | 26 (S) |
| 13Jan2016-J-397  | Subclinical | 46 (S)                      | 37 (S) | 27 (S) | 30 (S) | 30 (S) | 24 (S) |
| 05Jan2016-E-315  | Subclinical | 41 (S)                      | 34 (S) | 27 (S) | 30 (S) | 30 (S) | 26 (S) |
| 15Dec2015-E-405  | Clinical    | 22 (R)                      | 34 (S) | 28 (S) | 26 (S) | 30 (S) | 25 (S) |

*Table S3 continues next page.*

*Table S3 continued.*

| Isolate ID      | Sample type | Diameter (mm) (Sensitivity) |        |        |        |        |        |
|-----------------|-------------|-----------------------------|--------|--------|--------|--------|--------|
|                 |             | PEN                         | NOV    | CEF    | TET    | XNL    | OXA    |
| 05Jan2016-E-438 | Subclinical | 44 (S)                      | 36 (S) | 28 (S) | 28 (S) | 30 (S) | 25 (S) |
| 05Jan2016-E-340 | Clinical    | 22 (R)                      | 34 (S) | 26 (S) | 28 (S) | 30 (S) | 24 (S) |
| 20Nov2015-L-555 | Clinical    | 49 (S)                      | 36 (S) | 28 (S) | 30 (S) | 33 (S) | 30 (S) |
| 14Jan2016-K-585 | Subclinical | 44 (S)                      | 37 (S) | 27 (S) | 32 (S) | 34 (S) | 30 (S) |
| 30Nov2015-M-885 | Clinical    | 21 (R)                      | 37 (S) | 28 (S) | 30 (S) | 37 (S) | 22 (S) |
| 10Dec2015-N-28  | Subclinical | 16 (R)                      | 36 (S) | 26 (S) | 26 (S) | 36 (S) | 19 (S) |
| 14Jan2016-K-695 | Subclinical | 11 (R)                      | 34 (S) | 28 (S) | 29 (S) | 27 (S) | 16 (S) |
| 10Dec2015-N-53  | Subclinical | 14 (R)                      | 36 (S) | 28 (S) | 30 (S) | 26 (S) | 12 (I) |
| 22Nov2015-H-223 | Clinical    | 19 (R)                      | 40 (S) | 30 (S) | 33 (S) | 40 (S) | 22 (S) |
| 10Dec2015-N-79  | Subclinical | 18 (R)                      | 38 (S) | 29 (S) | 30 (S) | 32 (S) | 20 (S) |
| 06Dec2015-O-261 | Clinical    | 40 (S)                      | 34 (S) | 26 (S) | 30 (S) | 34 (S) | 28 (S) |
| 10Dec2015-N-242 | Subclinical | 12 (R)                      | 30 (S) | 27 (S) | 28 (S) | 25 (S) | 12 (I) |
| 07Jan2016-N-348 | Clinical    | 14 (R)                      | 26 (S) | 28 (S) | 30 (S) | 25 (S) | 12 (I) |
| 10Dec2015-N-365 | Subclinical | 15 (R)                      | 31 (S) | 27 (S) | 30 (S) | 30 (S) | 19 (S) |
| 14Jan2016-K-117 | Subclinical | 14 (R)                      | 34 (S) | 29 (S) | 27 (S) | 29 (S) | 15 (S) |
| 14Dec2015-P-109 | Clinical    | 34 (S)                      | 36 (S) | 28 (S) | 30 (S) | 30 (S) | 28 (S) |
| 20Jan2016-C-470 | Subclinical | 44 (S)                      | 34 (S) | 26 (S) | 28 (S) | 30 (S) | 26 (S) |
| 14Jan2016-K-478 | Subclinical | 13 (R)                      | 34 (S) | 29 (S) | 28 (S) | 29 (S) | 16 (S) |
| 19Nov2015-Q-416 | Clinical    | 50 (S)                      | 36 (S) | 28 (S) | 30 (S) | 36 (S) | 31 (S) |
| 20Jan2016-C-508 | Subclinical | 50 (S)                      | 36 (S) | 34 (S) | 32 (S) | 34 (S) | 30 (S) |
| 19Jan2016-A-58  | Subclinical | 19 (R)                      | 35 (S) | 28 (S) | 32 (S) | 31 (S) | 22 (S) |
| 27Jan2016-B-809 | Subclinical | 44 (S)                      | 34 (S) | 27 (S) | 28 (S) | 30 (S) | 26 (S) |

**Supplementray Table S4.** The presence-absence of 14 resistance genes and the antimicrobial susceptibility across 51 *S. aureus* isolates. Antimicrobial tested zone diffusion includes penicillin (Pen), novobiocin (Nov), ceftiofur (Cef), tetracycline (Tet), ceftiofur (XNL), and oxacillin (OXA); with isolates being declared susceptible (S) or resistant (R) (including those also identified as intermediate), based on CLSI recommendations. Note: one isolate was only tested for *Cef* and *Tet* resistance therefore (–) has been used to indicate cases when no isolates tested had the gene present.

| Gene presence/absence<br>(no. isolates with gene) |         | Pen |    | Nov |    | Cef |    | Tet |    | XNL |    | OXA |    |
|---------------------------------------------------|---------|-----|----|-----|----|-----|----|-----|----|-----|----|-----|----|
|                                                   |         | R   | S  | R   | S  | R   | S  | R   | S  | R   | S  | R   | S  |
| <i>ant(9)-ia</i><br>(n = 1)                       | Absent  | 18  | 32 | 0   | 50 | 0   | 50 | 0   | 50 | 0   | 50 | 3   | 47 |
|                                                   | Present | -   | -  | -   | -  | 1   | 0  | 0   | 1  | -   | -  | -   | -  |
| <i>blaI</i><br>(n = 18)                           | Absent  | 1   | 32 | 0   | 33 | 0   | 33 | 0   | 33 | 0   | 33 | 0   | 33 |
|                                                   | Present | 17  | 0  | 0   | 17 | 1   | 17 | 0   | 18 | 0   | 17 | 3   | 14 |
| <i>blaPC1</i><br>(n = 4)                          | Absent  | 14  | 32 | 0   | 46 | 0   | 46 | 0   | 46 | 0   | 46 | 0   | 46 |
|                                                   | Present | 4   | 0  | 0   | 4  | 0   | 4  | 0   | 4  | 0   | 4  | 3   | 1  |
| <i>blaR1</i><br>(n = 18)                          | Absent  | 1   | 32 | 0   | 33 | 0   | 33 | 0   | 33 | 0   | 33 | 0   | 33 |
|                                                   | Present | 17  | 0  | 0   | 17 | 1   | 17 | 0   | 18 | 0   | 17 | 3   | 14 |
| <i>blaZ</i><br>(n = 17)                           | Absent  | 2   | 32 | 0   | 34 | 0   | 34 | 0   | 34 | 0   | 46 | 0   | 34 |
|                                                   | Present | 16  | 0  | 0   | 16 | 1   | 16 | 0   | 17 | 0   | 4  | 3   | 13 |
| <i>dfrC</i><br>(n = 1)                            | Absent  | 18  | 31 | 0   | 49 | 0   | 49 | 0   | 49 | 0   | 33 | 0   | 34 |
|                                                   | Present | 0   | 1  | 0   | 1  | 0   | 1  | 0   | 1  | 0   | 17 | 3   | 13 |
| <i>erm(A)</i><br>(n = 2)                          | Absent  | 17  | 32 | 0   | 49 | 0   | 49 | 0   | 49 | 0   | 34 | 3   | 46 |
|                                                   | Present | 1   | 0  | 0   | 1  | 1   | 1  | 0   | 2  | 0   | 16 | 0   | 1  |
| <i>fosD</i><br>(n = 6)                            | Absent  | 18  | 27 | 0   | 45 | 0   | 45 | 0   | 45 | 0   | 49 | 3   | 42 |
|                                                   | Present | 0   | 5  | 0   | 5  | 1   | 5  | 0   | 6  | 0   | 1  | 0   | 5  |
| <i>fusC</i><br>(n = 1)                            | Absent  | 18  | 32 | 0   | 50 | 0   | 50 | 0   | 50 | 0   | 50 | 3   | 47 |
|                                                   | Present | -   | -  | -   | -  | 1   | 0  | 0   | 1  | -   | -  | -   | -  |
| <i>mecA</i><br>(n = 1)                            | Absent  | 18  | 32 | 0   | 50 | 0   | 50 | 0   | 50 | 0   | 50 | 3   | 47 |
|                                                   | Present | -   | -  | -   | -  | 1   | 0  | 0   | 1  | -   | -  | -   | -  |
| <i>mecR1</i><br>(n = 1)                           | Absent  | 18  | 32 | 0   | 50 | 0   | 50 | 0   | 50 | 0   | 50 | 3   | 47 |
|                                                   | Present | -   | -  | -   | -  | 1   | 0  | 0   | 1  | -   | -  | -   | -  |
| <i>qacA</i><br>(n = 4)                            | Absent  | 14  | 32 | 0   | 46 | 0   | 46 | 0   | 46 | 0   | 46 | 0   | 46 |
|                                                   | Present | 4   | 0  | 0   | 4  | 0   | 4  | 0   | 4  | 0   | 4  | 3   | 1  |
| <i>qacB</i><br>(n = 2)                            | Absent  | 16  | 32 | 0   | 48 | 0   | 48 | 0   | 48 | 0   | 48 | 3   | 45 |
|                                                   | Present | 2   | 0  | 0   | 2  | 0   | 2  | 0   | 2  | 0   | 2  | 0   | 2  |
| <i>tet(38)</i><br>(n = 51)                        | Absent  | 0   | 0  | 0   | 0  | 0   | 0  | 0   | 0  | 0   | 0  | 0   | 0  |
|                                                   | Present | 18  | 32 | 0   | 50 | 0   | 50 | 0   | 50 | 0   | 50 | 3   | 47 |

**Supplementary Table S5.** The dry cow therapy treatment reported by 17 farms from which 50 *S. aureus* isolates were sampled and classified as “sensitive”, “intermediate”, or “resistant” to penicillin (PEN, 10 µg) following a zone diffusion test. For the purpose of this analysis, intermediate” isolates have been groups with the “resistant” isolates.

|                |               |          | Number of animals (% treated) |          |           |           |
|----------------|---------------|----------|-------------------------------|----------|-----------|-----------|
| Classification | Antimicrobial | <i>n</i> | Bovaclox                      | Dryclox  | Cepravin  | Orbenin   |
| Resistant      | PEN           | 18       | 4 (22.2)                      | 0 (0.00) | 12 (66.7) | 4 (22.2)  |
|                | OXA           | 3        | 0 (0.00)                      | 0 (0.00) | 3 (100)   | 0 (0.00)  |
| Sensitive      | PEN           | 32       | 1 (3.1)                       | 5 (15.6) | 0 (0.00)  | 20 (62.5) |
|                | OXA           | 47       | 8 (17.0)                      | 6 (12.8) | 18 (38.3) | 24 (51.1) |



**Supplementary Table S6.** Scoary result summary showing the genes found to be significantly associated with *S. aureus* isolates showing resistance to either penicillin (n=18) or oxacillin (n=3) and the Gene Ontology (GO) terms indicating either the biological processes or molecular functions associated with the gene products. In total 50 *S. aureus* isolates were included in the analysis with significant genes identified as those with an odds ratio greater than 1, a specificity greater than 95% and, a Benjamini-Hochberg corrected p-value below 0.05.

| Gene                           | GO terms                                                                             | Number of isolates gene present (%) |               |
|--------------------------------|--------------------------------------------------------------------------------------|-------------------------------------|---------------|
|                                |                                                                                      | PEN resistant                       | PEN sensitive |
| <i>blaI</i>                    | DNA binding, gene expression and, penicillinase repressor                            | 16 (88.9)                           | 0             |
| <i>blaZ</i>                    | Betalactamase and hydrolase activity                                                 | 10 (55.6)                           | 0             |
| <i>xerC-2</i><br><i>xerC-5</i> | DNA recombination, integration and binding and, cell division                        | 10 (55.6)<br>10 (55.6)              | 0<br>0        |
| <i>setA</i>                    | Sugar efflux transporter                                                             | 9 (50.0)                            | 1 (3.1)       |
| <i>group-1603</i>              | DNA binding and isomerase activity                                                   | 7 (38.9)                            | 0             |
| <i>blaR1</i>                   | Regulatory protein blaR1, penicillin binding and, cell membrane component            | 7 (38.9)                            | 0             |
| <i>dpiB</i>                    | Cell membrane component, protein histidine kinase activity and, transferase activity | 8 (44.4)                            | 1 (3.1)       |
| <i>group-1117</i>              | Transmembrane transport activity                                                     | 6 (33.3)                            | 0             |
| <i>group-1840</i>              | Cell membrane component and hydrolase activity                                       | 6 (33.3)                            | 0             |
| <i>group-3090</i>              | Transmembrane transport activity and NADH dehydrogenase                              | 6 (33.3)                            | 0             |
| <i>qacR</i>                    | DNA binding and transcriptional regulator                                            | 6 (33.3)                            | 0             |

*Table S6 continues next page.*

*Table S6 continued.*

| Gene              | GO terms                                                                         | Number of isolates gene present (%) |               |
|-------------------|----------------------------------------------------------------------------------|-------------------------------------|---------------|
|                   |                                                                                  | OXA resistant                       | OXA sensitive |
| <i>group-1669</i> | Peptidase and hydrolase activity, proteolysis and, pathogenesis                  | 3 (100)                             | 1 (2.1)       |
| <i>dauA</i>       | Transmembrane transport activity                                                 | 3 (100)                             | 1 (2.1)       |
| <i>nhaX-1</i>     | Transcription regulation                                                         | 3 (100)                             | 1 (2.1)       |
| <i>group-3291</i> | Regulatory protein BlaR1                                                         | 3 (100)                             | 1 (2.1)       |
| <i>group-112</i>  | Transferase and kinase activity, metal ion binding and, phosphorylation          | 3 (100)                             | 2 (4.3)       |
| <i>clpE</i>       | ATP binding and peptidase activity                                               | 3 (100)                             | 2 (4.3)       |
| <i>group-3310</i> | Isomerase and catalytic activity and, gluconeogenesis                            | 3 (100)                             | 2 (4.3)       |
| <i>tcaA-2</i>     | Cell membrane component                                                          | 3 (100)                             | 2 (4.3)       |
| <i>hicB</i>       | Antitoxin                                                                        | 3 (100)                             | 2 (4.3)       |
| <i>dinB-2</i>     | DNA binding, replication and repair, transferase activity and, metal ion binding | 3 (100)                             | 2 (4.3)       |

**Supplementary Figure S1.** Scatter plot showing the relationship between antimicrobial usage, across 14 dairy herds in the Waikato region of New Zealand's North Island, and the number of resistant genes found to be present in isolates collected from each farm. The size of each point is proportional to the total number of genes present which the colour indicates which genes were present. AMU: antimicrobial usage, DD: daily dose.

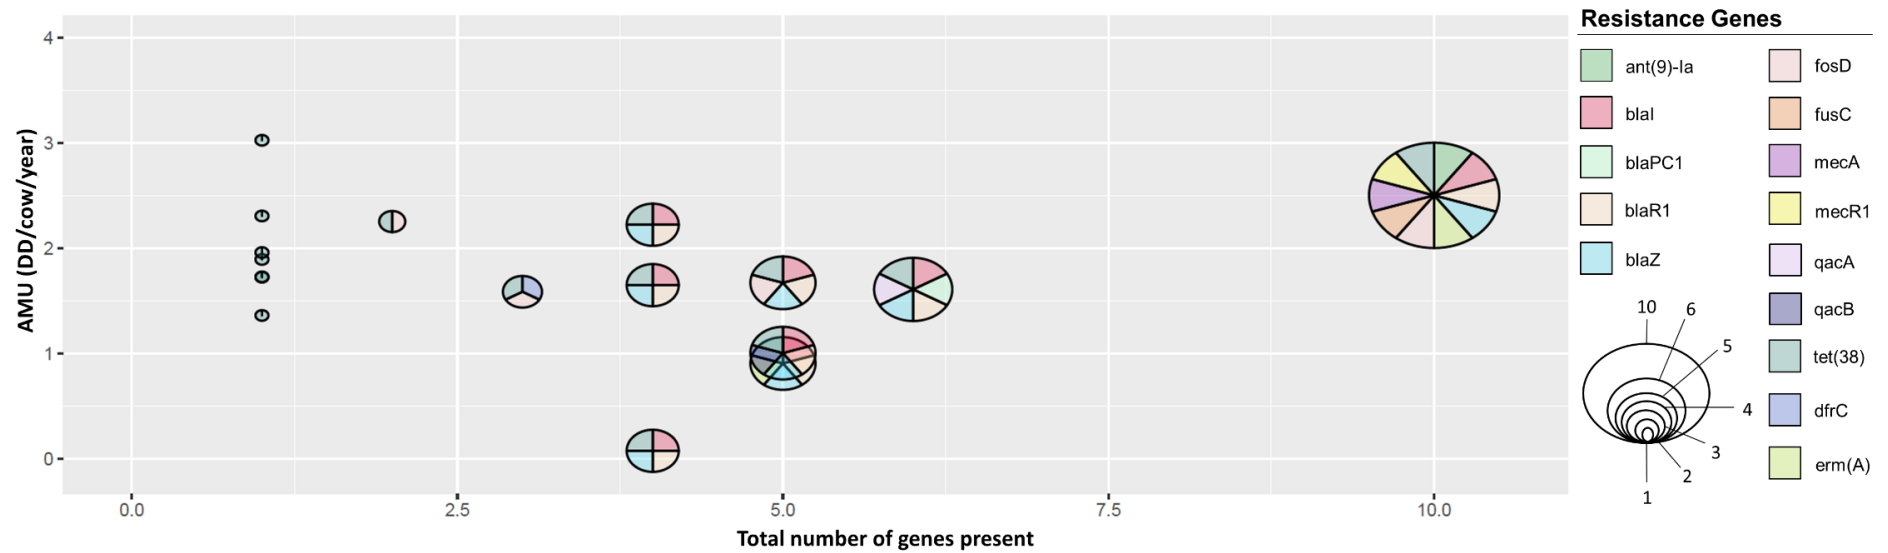

Supplement: s1 [file s1]
